# Supplementary figures and images for: Performance‐based IADL evaluation of older adults with cognitive impairment within a smart home: A feasibility study
Source: PubMed Central journal article supplement — Alzheimers Dement (N Y). 2021 Mar 3;7(1):e12152. doi: 10.1002/trc2.12152 (PMC7927161; doi:10.1002/trc2.12152), 2021-03-03

|                                                                                            |                                                                                             |                                                                                              |                                                                                              |                                                                                              |                                                                                              |
|--------------------------------------------------------------------------------------------|---------------------------------------------------------------------------------------------|----------------------------------------------------------------------------------------------|----------------------------------------------------------------------------------------------|----------------------------------------------------------------------------------------------|----------------------------------------------------------------------------------------------|
|  \$1.50   |  \$2.50    |  \$5.00   |  \$2.50   |  \$1.50   |  \$4.00   |
|  \$5.50   |  \$3.50    |  \$1.50   |  \$2.50   |  \$2.50   |  \$7.00   |
|  \$4.00   |  \$4.00   |  \$2.50   |  \$3.50   |  \$3.00  |  \$3.50  |
|  \$8.50 |  \$3.00  |  \$3.00 |  \$4.50 |  \$6.00 |  \$3.50 |
|  \$2.00 |  \$2.00 |  \$1.50 |  \$4.50 |  \$2.50 |  \$5.50 |
|  \$2.50 |  \$2.50 |  \$2.50 |  \$2.00 |  \$5.50 |  \$3.50 |

Supplement: TRC2-7-e12152-s001.pdf [file TRC2-7-e12152-s001.pdf]

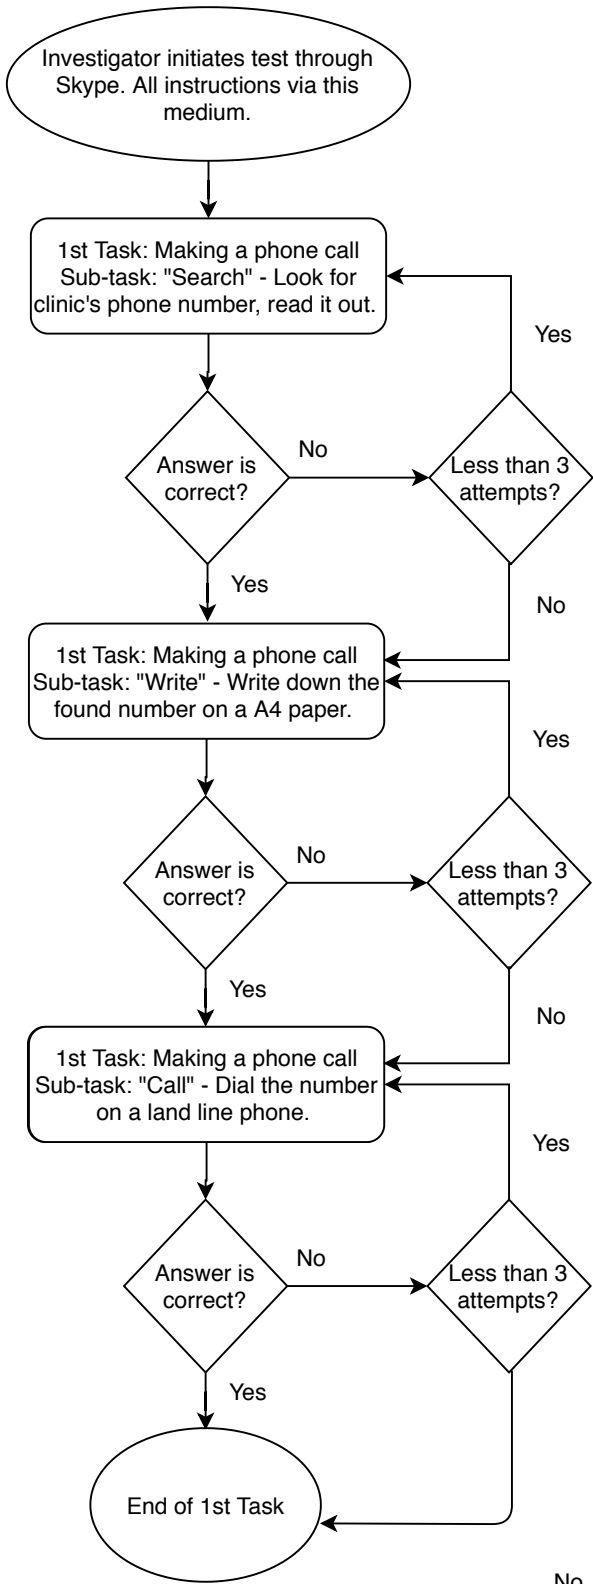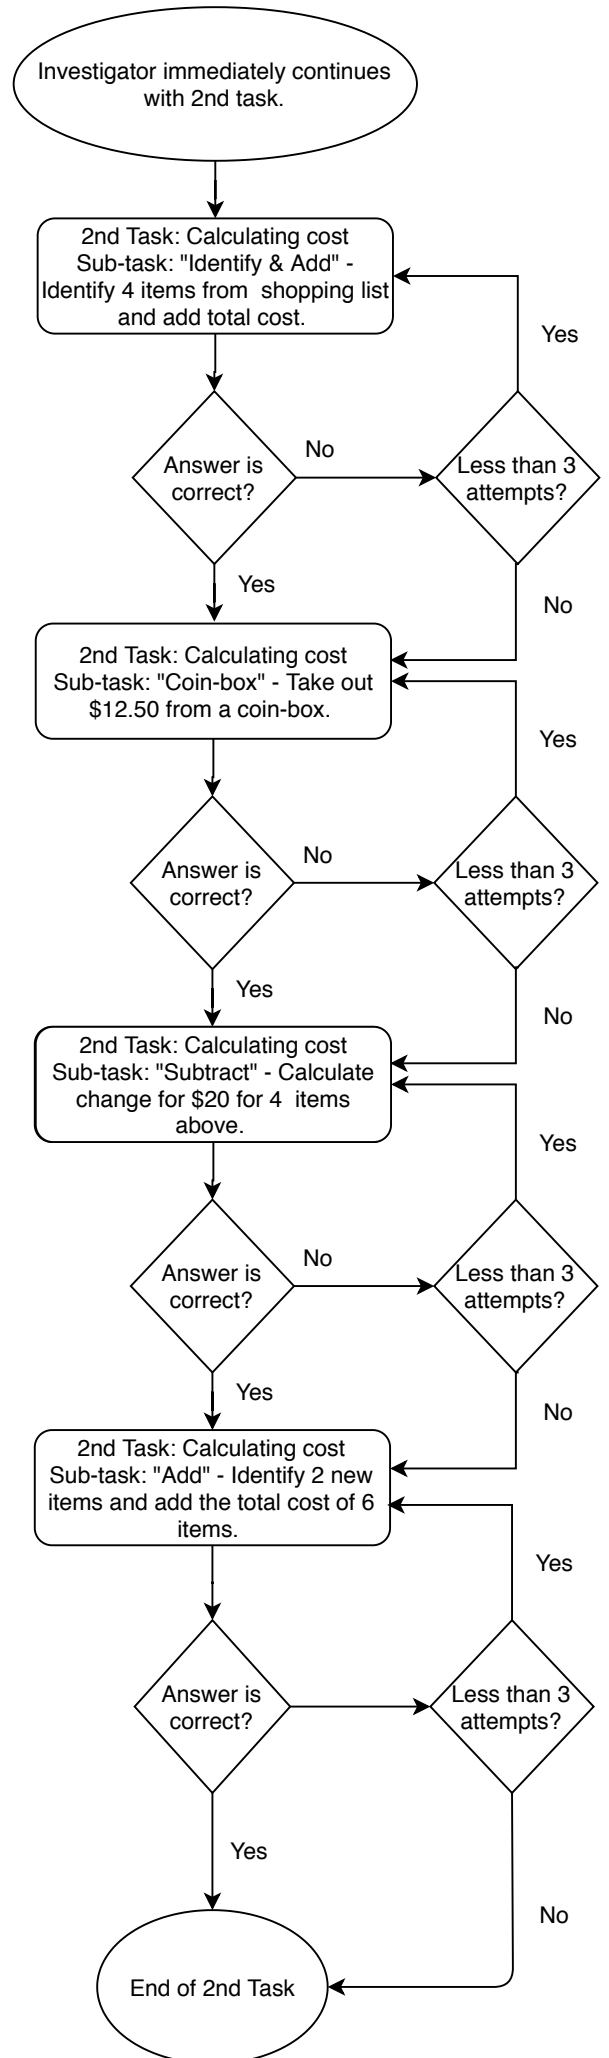

Supplement: TRC2-7-e12152-s002.pdf [file TRC2-7-e12152-s002.pdf]
